# Supplementary material
Source: PubMed Central journal article supplement (PMC3946117)
Supplement: 13280_2013_435_MOESM1_ESM.pdf [file 13280_2013_435_MOESM1_ESM.pdf]

## Electronic Supplementary Material

### Nutrient abatement potential and abatement costs of waste water treatment plants in the Baltic Sea region

Sami Hautakangas, Markku Ollikainen, Kari Aarnos, Pirjo Rantanen

#### Electronic Supplementary Material A

##### Data Collection and Definition of WWTP Treatment Technologies

Two main databases from which data was collected at first:

- European Environmental Agency (EEA, 2010a, 2010b) provides a database on Urban Waste Water Treatment Directive (UWWTD) containing data on every reported wastewater treatment plant in the European Union.
- Helsinki Commission (HELCOM, 2006, 2010) collects data on inputs of land-based sources of the Baltic Sea drainage basin, including wastewater treatment plants and their nitrogen and phosphorus emissions.

The additional data sources include the following:

- The Central Data Repository of ReportNet (CDR; EIONET, 2010) provides data for assessing the state of environment in Europe. CDR is used as a reporting system to EEA. Database for Denmark, Estonia, Germany, Latvia and Poland.
- The National Water Management Authority in Poland has implemented The National Programme for Municipal Waste Water Treatment (KZGW, 2010) that offers data on the progress and scenarios of the programme. This data includes technology used in general terms.
- The Agency for Spatial and Environmental Planning in Denmark has published a report as a part of the national monitoring programme also containing detailed information on WWTPs (By- og Landskabsstyrelsen, 2009).
- Unpublished data was provided by Finnish Environment Institute's (2010) VAHTI database, Landesamt für Umwelt, Naturschutz und Geologie Mecklenburg – Vorpommern (2010), and Ministry of Agriculture, Environment and Rural Areas the State of Schleswig-Holstein (2010). The Finnish data was also partially checked using OIVA database (Valtion ympäristöhallinnon virastot, 2010).
- The data on Russian WWTPs is from Vodokanal (2006), Swedish Environmental Protection Agency 2009, 2010) and Ovasikainen (2010).
- Various Internet sources were also used to supplement data of Sweden and Lithuania. For Lithuanian data also scientific articles (Pietilä 2005; Aukštaitijos Vandenys 2009; Klaipėdos Vanduo 2010; Šiaulių Vandenys 2010a, 2010b) were used.
- An excursion to Poland was also made to collect data.
- The reference years of the data differs from 2003 to 2009.

- More details on data collection see Ruotsalainen (2011).

The following information was collected from each WWTP: 1) name of the WWTP and the city with coordinates, 2) reference year of data, 3) annual means of the PE loads and the influent flow rates, 4) annual means of the influent and effluent loads of BOD<sub>5</sub><sup>1</sup> or BOD<sub>7</sub><sup>2</sup>, COD<sub>Cr</sub><sup>3</sup>, total nitrogen and total phosphorus, and 5) the process configuration of the WWTP.

**Table A1.** The estimation of the treatment processes utilizing effluent concentrations and required technological procedures to reach certain abatement levels

| <b>N reduction</b>        | <b>P reduction</b>                     | <b>Estimated treatment</b>                               |                                                                                               |
|---------------------------|----------------------------------------|----------------------------------------------------------|-----------------------------------------------------------------------------------------------|
| < 30 %                    | < 30 %                                 | Mechanical (M)                                           |                                                                                               |
| 30 % - 50 %               | 30 % - 70 %                            | Mechanic-biological (MB)                                 |                                                                                               |
| 50 % - 85 %               | 70 % - 98 %                            | Mechanical, biological and chemical (MBC)                |                                                                                               |
| > 85 %                    | > 98 %                                 | Mechanical, biological, chemical and advanced (MBCA)     |                                                                                               |
| <b>N reduction target</b> | <b>50 %</b>                            | <b>70 %</b>                                              | <b>85- 95 %</b>                                                                               |
| Required procedure        | 40 % more volume in biological process | Methanol addition                                        | Methanol addition and tertiary biological filter                                              |
| <b>P reduction target</b> | <b>70 %</b>                            | <b>80- 90 %</b>                                          | <b>98- %</b>                                                                                  |
| Required procedure        | Precipitation chemical addition        | Precipitation chemical addition and tertiary sand filter | Precipitation chemical addition, tertiary sand filtration enhanced with final microfiltration |

<sup>1</sup> Biological Oxygen Demand; quantity of oxygen consumed over 5 days.

<sup>2</sup> Biological Oxygen Demand; quantity of oxygen consumed over 7 days.

<sup>3</sup> Chemical Oxygen Demand with dichromate method.

## Electronic Supplementary Material B

### Estimated Abatement outside the Sample

**Table B1.** Estimated nutrient abatement levels in WWTPs in the population outside the sample in Estonia, Latvia, Lithuania and Poland

| Proportion of the WWTPs | WWTPs 10 000 – 220 000 PE |                        | WWTPs over 220 000 PE  |                        |
|-------------------------|---------------------------|------------------------|------------------------|------------------------|
|                         | $\frac{1}{2}$             | $\frac{1}{2}$          | $\frac{2}{5}$          | $\frac{2}{5}$          |
| <b>Baseline case</b>    | <b>Abatement level</b>    | <b>Abatement level</b> | <b>Abatement level</b> | <b>Abatement level</b> |
| Nitrogen                | 30 %                      | 50 %                   | 30 %                   | 50 %                   |
| Phosphorus              | 40 %                      | 60 %                   | 40 %                   | 60 %                   |
| <b>Alternative case</b> | <b>Abatement level</b>    | <b>Abatement level</b> | <b>Abatement level</b> | <b>Abatement level</b> |
| Nitrogen                | 40 %                      | 65 %                   | 40 %                   | 65 %                   |
| Phosphorus              | 50 %                      | 70 %                   | 50 %                   | 70 %                   |

## Electronic Supplementary Material C

### EU's Urban Waste Water Treatment Directive and HELCOM Recommendations

**Table C1.** EU Requirements and Helsinki Commission recommendations for discharges from WWTPs to sensitive areas. The values for concentration or for the percentage of reduction shall apply

| Nutrient                                                               | Maximum concentration                                                                                    | Minimum percentage of reduction <sup>4</sup> |
|------------------------------------------------------------------------|----------------------------------------------------------------------------------------------------------|----------------------------------------------|
| <b>EU's Urban Waste Water Treatment Directive</b>                      |                                                                                                          |                                              |
| Total phosphorus                                                       | 2 mg l <sup>-1</sup> (WWTP size: 10 000 – 100 000 PE)<br>1 mg l <sup>-1</sup> (more than 100 000 PE)     | 80                                           |
| Total nitrogen <sup>5</sup>                                            | 15 mg l <sup>-1</sup> (10 000 – 100 000 PE)<br>10 mg l <sup>-1</sup> (more than 100 000 PE) <sup>6</sup> | 70-80                                        |
| <b>Recommendations by Helsinki Commission's Baltic Sea Action Plan</b> |                                                                                                          |                                              |
| Total phosphorus <sup>7</sup>                                          | 0.5 mg l <sup>-1</sup> (more than 10 000 PE)                                                             | 90                                           |
| Total nitrogen <sup>8</sup>                                            | 15 mg l <sup>-1</sup> (10 001 – 100 000 PE)<br>10 mg l <sup>-1</sup> (more than 100 000 PE)              | 70-80                                        |

Sources: EEC (1991) and HELCOM (2007).

<sup>4</sup> Reduction in relation to the load of the influent.

<sup>5</sup> Total nitrogen means the sum of total Kjeldahl nitrogen (organic and ammoniacal nitrogen) nitrate-nitrogen and nitrite-nitrogen.

<sup>6</sup> These values for concentration are annual means. However, the requirements for nitrogen may be checked using daily averages when it is proved that the same level of protection is obtained. In this case, the daily average must not exceed 20 mg/l of total nitrogen for all the samples when the temperature from the effluent in the biological reactor is superior or equal to 12 °C. The conditions concerning temperature could be replaced by a limitation on the time of operation to take account of regional climatic conditions.

<sup>7</sup> Discharging directly or indirectly to the marine areas.

<sup>8</sup> Discharging directly or indirectly to the marine areas sensitive to nitrogen.

## Electronic Supplementary Material D

### Nutrient Reduction Potentials; an Alternative Case

**Table D1.** Nutrient reduction potentials in each country under different abatement level targets; an alternative case

| Country          | Nitrogen abatement potential,<br>t a <sup>-1</sup> |               |               | Phosphorus abatement potential,<br>t a <sup>-1</sup> |             |             |
|------------------|----------------------------------------------------|---------------|---------------|------------------------------------------------------|-------------|-------------|
|                  | 70 %                                               | 80 %          | 90 %          | 80 %                                                 | 90 %        | 95 %        |
| <b>Denmark</b>   | 0                                                  | 41            | 820           | 0                                                    | 51          | 160         |
| <b>Estonia</b>   | 340                                                | 630           | 1100          | 69                                                   | 120         | 160         |
| <b>Finland</b>   | 3900                                               | 5400          | 7300          | 0                                                    | 0           | 4           |
| <b>Germany</b>   | 0                                                  | 20            | 540           | 0                                                    | 0           | 1           |
| <b>Latvia</b>    | 1500                                               | 1900          | 2300          | 120                                                  | 190         | 230         |
| <b>Lithuania</b> | 810                                                | 1400          | 1900          | 120                                                  | 180         | 230         |
| <b>Poland</b>    | 17 500                                             | 28 000        | 40 000        | 3200                                                 | 4900        | 5800        |
| <b>Russia</b>    | 2500                                               | 5000          | 7600          | 410                                                  | 800         | 1000        |
| <b>Sweden</b>    | 3100                                               | 4700          | 7800          | 0                                                    | 0           | 3           |
| <b>TOTAL</b>     | <b>30 000</b>                                      | <b>47 000</b> | <b>69 000</b> | <b>3900</b>                                          | <b>6200</b> | <b>7700</b> |

Individual values do not necessarily sum up to total due to rounding

## Electronic Supplementary Material E

### Untreated Waste Waters in Poland and Russia and Costs of New Sewers

**Table E1.** Untreated nitrogen and phosphorus loads and combined nutrient reduction potentials of untreated waste waters and in currently treated waste waters at different percentage levels in Poland and Russia

| Untreated loads                       | POL      |        |        | RUS        |       |       |
|---------------------------------------|----------|--------|--------|------------|-------|-------|
| Nitrogen, t a <sup>-1</sup>           | 4380     |        |        | 3395       |       |       |
| Phosphorus, t a <sup>-1</sup>         | 821      |        |        | 453        |       |       |
| BOD <sub>7</sub> , kg d <sup>-1</sup> | 84 000   |        |        | 31 000     |       |       |
| Reduction potential                   | Nitrogen |        |        | Phosphorus |       |       |
| t a <sup>-1</sup>                     | 70 %     | 80 %   | 90 %   | 80 %       | 90 %  | 95 %  |
| <b>POL</b> , untreated                | 3066     | 3504   | 3942   | 657        | 739   | 780   |
| treated+untreated                     | 33 709   | 45 001 | 57 074 | 5 520      | 7 314 | 8 274 |
| <b>RUS</b> , untreated                | 2376     | 2716   | 3055   | 362        | 407   | 430   |
| treated+untreated                     | 4852     | 7721   | 10 687 | 770        | 1202  | 1470  |

Sources: EIONET 2010 and HELCOM 2010b.

The costs of new sewers are based on COWI (2007), but inflated to 2010 prices by the cost index of water supply and sewerage in Finland (Statistics Finland 2011). This is the closest index available we had access to. Drawing on these costs, we estimate that the annual costs are roughly 27 million euros in Poland and around 9 million euros in Russia to construct a pipe system to connect non-connected households to the new waste water treatment plants.

**Table E2.** Annual costs of new sewers connecting households to WWTP in three chosen WWTP size

| WWTP size, PE | Total cost, € | Cost PE <sup>-1</sup> , € |
|---------------|---------------|---------------------------|
| 2 000         | 160 000       | 80                        |
| 30 000        | 1 500 000     | 49                        |
| 100 000       | 3 700 000     | 37                        |

Sources: COWI (2007) and Statistics Finland (2011).

Assuming somewhat arbitrarily that Poland and Russia will treat 50 % of their currently untreated waters the PEs are approximately 600 000 and 220 000, respectively. We assume that the waste waters will be handled by constructing several small-sized (approximately 50 000 PE) plants. Thus they need to build 12 new plants in Poland and 4 new plants in Russia. The sewage costs are divided equally among nitrogen, phosphorus and BOD.

## Supplementary Material F

### Cost Structure of Nutrient Abatement Process in WWTPs

**Table F1.** Total cost (million euros) calculations of nitrogen abatement in WWTPs 1, 2 and 4 under selected abatement levels

| Size class                       | 1 (PE 10 000 – 80 000) |            |            | 2 (PE 80 000 – 220 000) |            |            | 4 (PE 500 000 - ) |            |           |
|----------------------------------|------------------------|------------|------------|-------------------------|------------|------------|-------------------|------------|-----------|
|                                  | 30 %                   | 70 %       | 90 %       | 30 %                    | 70 %       | 90 %       | 30 %              | 70 %       | 90 %      |
| Investment costs (NPV*)          | 28                     | 43         | 53         | 73                      | 81         | 100        | 600               | 710        | 830       |
| Operating costs (NPV)            | 11                     | 17         | 18         | 31                      | 35         | 37         | 93                | 120        | 140       |
| Total cost (NPV) a <sup>-1</sup> | 13                     | 2.0        | 2.3        | 3.5                     | 3.9        | 4.7        | 23                | 28         | 32        |
| Share of costs for N             | 10 %                   | 25 %       | 40 %       | 10 %                    | 25 %       | 40 %       | 10 %              | 25 %       | 40 %      |
| <b>Total cost of N abatement</b> | <b>0.1</b>             | <b>0.5</b> | <b>0.9</b> | <b>0.3</b>              | <b>1.0</b> | <b>1.9</b> | <b>2.3</b>        | <b>6.9</b> | <b>13</b> |

\*NPV = Net Present Value

**Table F2.** Total cost (million euros) calculations of phosphorus abatement in WWTP 1, 2 and 4 under selected abatement levels

| Size class                       | 1 (PE 10 000 – 80 000) |            |            | 2 (PE 80 000 – 220 000) |            |            | 4 (PE 500 000 - ) |            |            |
|----------------------------------|------------------------|------------|------------|-------------------------|------------|------------|-------------------|------------|------------|
|                                  | 30 %                   | 70 %       | 95 %       | 30 %                    | 70 %       | 95 %       | 30 %              | 70 %       | 95 %       |
| Investment costs (NPV*)          | 24                     | 28         | 29         | 64                      | 70         | 71         | 600               | 630        | 630        |
| Operating costs (NPV)            | 12                     | 12         | 13         | 26                      | 26         | 27         | 76                | 78         | 87         |
| Total cost (NPV) a <sup>-1</sup> | 1.2                    | 1.3        | 1.4        | 3.0                     | 3.2        | 3.3        | 22                | 23         | 24         |
| Share of costs for P             | 15 %                   | 25 %       | 30 %       | 15 %                    | 25 %       | 30 %       | 15 %              | 25 %       | 30 %       |
| <b>Total cost of P abatement</b> | <b>0.2</b>             | <b>0.3</b> | <b>0.4</b> | <b>0.4</b>              | <b>0.8</b> | <b>1.0</b> | <b>3.4</b>        | <b>5.9</b> | <b>7.2</b> |

\*NPV = Net Present Value

Investment costs include 4 % expected returns with 30 years life span. Operating costs are discounted by 4 % rate. The costs are allocated to nitrogen, phosphorus and BOD.

## Electronic Supplementary Material G

### On Interest Rate

We use 4 % real interest rate. The effect of this rate through discounting is moderate, but through the expected returns of investments is remarkable. Increasing the real interest rate to 6 %, the total influence of these two will more than double the average abatement costs of phosphorus, while decreasing the rate to 2 % will cut the average costs by less than a half. The exact results depend on the size of the WWTP as well as on the abatement level, but the above estimations are approximate. In the case of nitrogen the effects are not so great. With 6 % real interest rate the average abatement costs are roughly  $\frac{1}{3}$  larger, while 2 % rate yields 10 to 20 % smaller costs compared to 4 % rate.

Economics does not provide an unambiguous answer to which real interest rate to choose. Here there are two points of view to be considered. First, the individual interest rate of the WWTPs owners i.e. how they value the future and what are their expected returns of the investments. Second, society's social interest rate i.e. how the society as a whole values the future; bearing in mind that waste water treatment is not naturally lucrative business. Therefore WWTPs are usually owned by society or made possible to be run by private company with various incentives. Nevertheless, waste water treatment plants are financed invariably by the society, in the last resort. Thus, we can fairly use the concept of social discounting.

As the investment period in the WWTPs here is 30 years, we are operating within one generation, saving us from the discussion of intergenerational discounting (see e.g. Portney et al. 1999). The 30 year span is also a long enough period to achieve considerable changes in the status of the Baltic Sea. Society considers this status along with other factors related to investments in waste water treatment to decide upon discount rate. If stressing the environmental part, as would be safe to assume when investing in WWTPs, society should not value present too much over future. Dasgupta et al. (2000) even show that in a special case an optimal social discount rate would be zero. All in all,



the real interest rate we use for discounting and for the expected returns is reasonable and rather conservative in economics.

## Electronic Supplementary Material H

### Average Abatement Costs in WWTPs

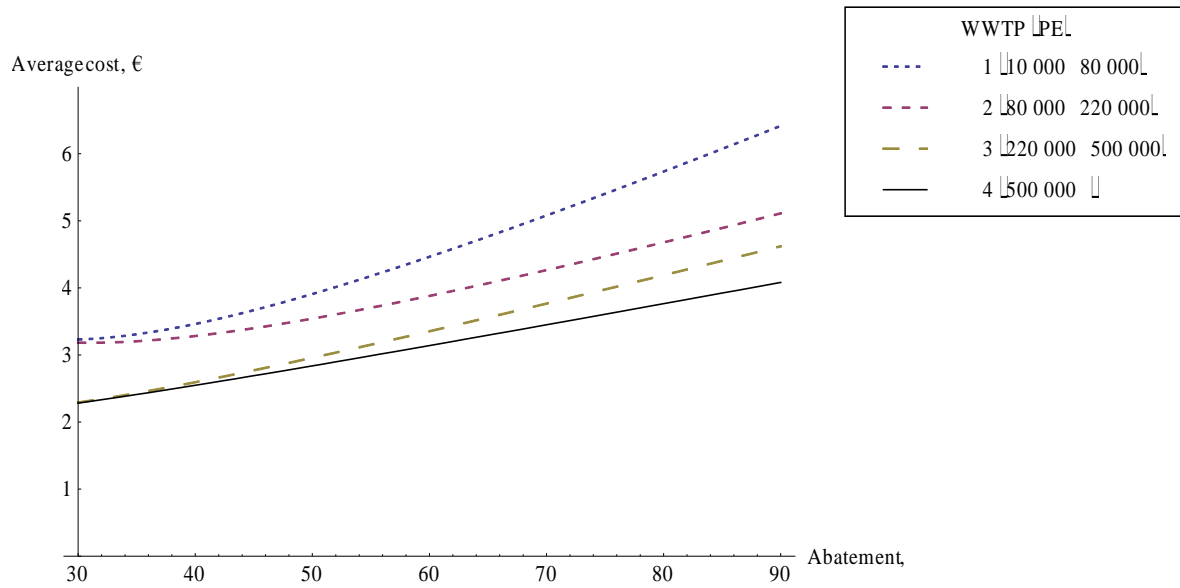

**Figure H1.** Average abatement cost of nitrogen in WWTPs as a function of abatement for the chosen size classes

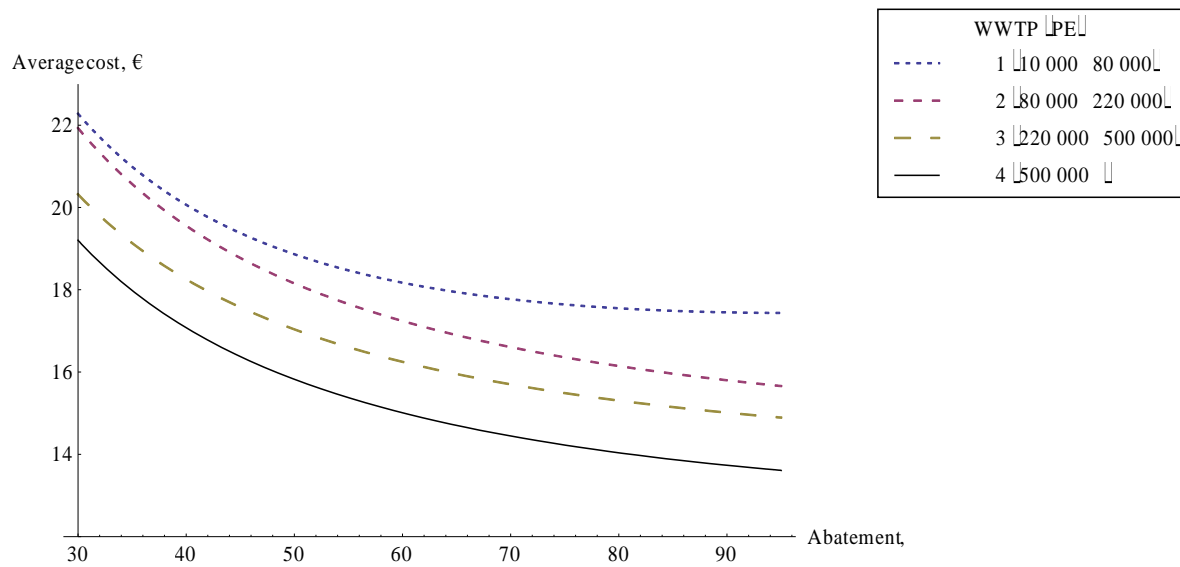

**Figure H2.** Average abatement cost of phosphorus in WWTPs as a function of abatement for the chosen size classes

## Electronic Supplementary Material I

### Total Abatement Cost Functions in WWTPs

Total cost functions for nitrogen abatement<sup>9</sup>

$$f(x_{N1}) = 104982 - 2009.73x_{N1} + 124.883x_{N1}^2 \quad (N1)$$

$$f(x_{N2}) = 195480 + 354.589x_{N2} + 203.259x_{N2}^2 \quad (N2)$$

$$f(x_{N3}) = 209999 + 3496.8x_{N3} + 519.862x_{N3}^2 \quad (N3)$$

$$f(x_{N4}) = 263235 + 36778x_{N4} + 1147.99x_{N4}^2 \quad (N4)$$

Total cost functions for phosphorus abatement<sup>10</sup>

$$f(x_{P1}) = 82371 + 3008.7x_{P1} + 8.774x_{P1}^2 \quad (P1)$$

$$f(x_{P2}) = 198500 + 8146.4x_{P2} + 4.1665x_{P2}^2 \quad (P2)$$

$$f(x_{P3}) = 484460 + 22073x_{P3} + 11.528x_{P3}^2 \quad (P3)$$

$$f(x_{P4}) = 1533000 + 59981x_{P4} + 35.467x_{P4}^2 \quad (P4)$$

Functions describe the total costs of abating nutrients in euros;  $x_i$  is the abatement percentage of each nutrient ( $N$  = nitrogen,  $P$  = phosphorus) in corresponding WWTP size class ( $i = N1, \dots, N4, P1, \dots, P4$ ).

Size classes:

1. (10 000-80 000 PE)
2. (80 000-220 000 PE)
3. (220 000-500 000 PE)
4. (500 000- PE)

---

<sup>9</sup> Figure 1

<sup>10</sup> Figure 4

## Electronic Supplementary Material J

### Cost of Abatement without Untreated Waste Waters

**Table J1.** Total costs of nitrogen and phosphorus abatement to reach the chosen levels of abatement without untreated waste waters

| Country      | Nitrogen abatement, million € |            |            | Phosphorus abatement, million € |            |            |
|--------------|-------------------------------|------------|------------|---------------------------------|------------|------------|
|              | 70 %                          | 80 %       | 90 %       | 80 %                            | 90 %       | 95 %       |
| Denmark      | 0                             | 0.5        | 7.7        | 0                               | 0          | 2.3        |
| Estonia      | 3.7                           | 6.1        | 9.9        | 1.4                             | 2.1        | 2.6        |
| Finland      | 29                            | 43         | 63         | 0                               | 0          | 0          |
| Germany      | 0                             | 0          | 3.4        | 0                               | 0          | 0          |
| Latvia       | 7.0                           | 9.5        | 12.5       | 1.6                             | 2.5        | 3.0        |
| Lithuania    | 8.7                           | 13         | 18         | 2.2                             | 3.0        | 3.6        |
| Poland       | 190                           | 280        | 390        | 65                              | 89         | 100        |
| Russia       | 16                            | 34         | 54         | 5                               | 10         | 13         |
| Sweden       | 23                            | 39         | 68         | 0                               | 0          | 0          |
| <b>TOTAL</b> | <b>280</b>                    | <b>430</b> | <b>630</b> | <b>75</b>                       | <b>110</b> | <b>130</b> |

Individual values do not necessarily sum up to total value due to rounding

**Table J2.** Total costs of nitrogen and phosphorus reduction to reach the chosen levels of abatement (including 50 % of the untreated waste waters in Poland and Russia); an alternative case

| Country      | Nitrogen abatement, million € |            |            | Phosphorus abatement, million € |            |            |
|--------------|-------------------------------|------------|------------|---------------------------------|------------|------------|
|              | 70 %                          | 80 %       | 90 %       | 80 %                            | 90 %       | 95 %       |
| Denmark      | 0                             | 0.5        | 7.7        | 0                               | 0          | 2.3        |
| Estonia      | 2.4                           | 4.7        | 8.5        | 1.0                             | 1.7        | 2.2        |
| Finland      | 29                            | 43         | 63         | 0                               | 0          | 0          |
| Germany      | 0                             | 0          | 3.4        | 0                               | 0          | 0          |
| Latvia       | 6.7                           | 9.2        | 12         | 1.5                             | 2.4        | 2.9        |
| Lithuania    | 5.4                           | 9.6        | 15         | 1.4                             | 2.2        | 2.9        |
| Poland       | 140                           | 240        | 350        | 57                              | 82         | 95         |
| Russia       | 25                            | 44         | 67         | 11                              | 16         | 19         |
| Sweden       | 23                            | 39         | 68         | 0                               | 0          | 0          |
| <b>TOTAL</b> | <b>230</b>                    | <b>380</b> | <b>590</b> | <b>72</b>                       | <b>100</b> | <b>130</b> |

Individual values do not necessarily sum up to total value due to rounding

## References for Electronic Supplementary Material

- Aukštaitijos Vandenyys. 2009. Wastewater treatment. Retrieved 2 July, 2010, from <http://www.avandenyys.lt/index.php?284690904>. (In Lithuanian).
- By- og Landskabsstyrelsen. 2009. Point source report 2007. Danish Ministry of Environment, Copenhagen, Denmark, 116 pp (in Danish).
- COWI. 2007. Economic Analysis of the BSAP with Focus on Eutrophication, Final Report, HELCOM and NEFCO, 112 pp.
- Dasgupta, P, Mäler, K-G. and S. Barnett. 1999. Intergenerational Equity, Social Discount Rates and Global Warming. In *Discounting and Intergenerational Equity*, ed. P.R. Portney, and J.P. Weyant, 189 pp. Washington DC: Resources for the Future.
- EEA. 2010a. Urban Waste Water Treatment Plants. [Interactive map]. Retrieved 9 June, 2010, from <http://www.eea.europa.eu/themes/water/interactive//uwwt-plants>.
- EEA. 2010b. Waterbase - UWWTD: Urban Waste Water Treatment Directive. Retrieved 2 June, 2010, from <http://www.eea.europa.eu/data-and-maps/data/waterbase-uwwtd-urban-waste-water-treatment-directive>.
- EEC. 1991. Council Directive 91/271/EEC of 21 May 1991 concerning urban waste-water treatment. Retrieved 19 April, 2011, from <http://eur-lex.europa.eu/LexUriServ/LexUriServ.do?uri=CONSLEG:1991L0271:20081211:EN:PDF>.
- EIONET. 2010. Central Data Repository. Retrieved 9 November, 2010, from <http://cdr.eionet.europa.eu/>.
- Finnish Environment Institute. 2010. VAHTI database.
- HELCOM. 2010. Pollution Load Compilation database (PLC). Helsinki Commission, Helsinki, Finland.
- Klaipėdos Vanduo. 2010. Sewage treatment plant. Retrieved 16 June, 2010, from <http://www3.vanduo.lt/lt/nuoteku-valykla>. (In Lithuanian).
- KZGW. 2010. The national program of urban waste water treatment. Retrieved 22 November, 2010, from <http://www.kzgw.gov.pl/pl/Krajowy-program-oczyszczania-sciekow-komunalnych.html>. (In Polish).
- Landesamt für Umwelt, Naturschutz und Geologie Mecklenburg-Vorpommern. 2010. 101213 Übergabe Daten 09 KA grosser 10000 EW an Finnland. German Office for the Environment, Nature Conservation and Geology, Güstrow, Germany.
- Ministry of Agriculture, Environment and Rural Areas the State of Schleswig-Holstein. 2010. Kom\_KA\_2009\_Ostsee\_SH\_FIN. Kiel, Germany.
- Nordvästra Skånes Vatten och Avlopp. 2010. Environmental Report 2009 - Öresundplant Helsingborg. Retrieved 3 January, 2011, from <http://www.nsva.se/Global/Dokument/Milj%C3%B6rapporter/Milj%C3%B6rapport%202009%20%C3%96resundsverket.pdf?epslanguage=sv>. (In Swedish).
- Ovaskainen, E. 2010. Experiences in Improving Waste Water Plant Operation. Retrieved 14 December, 2010, from <http://www.itamerihaaste.net/files/11/Ovaskainen.pdf>.

Pietilä, P. 2005. D43: WaterTime case study - Vilnius, Lithuania. Retrieved 2 July, 2010, from [http://www.watertime.net/wt\\_cs\\_cit\\_ncr.asp#Lithuania](http://www.watertime.net/wt_cs_cit_ncr.asp#Lithuania).

Portney, P.R. and J.P. Weyant (eds.). 1999. *Discounting and Intergenerational Equity*. Washington DC: Resources for the Future.

Ruotsalainen, I. 2011. Wastewater treatment plants in the Baltic Sea drainage basin. A Master of Science thesis. Espoo, Finland: Aalto University.

Šiaulių Vandenys. 2010a. Sewage treatment plant. Retrieved 21 June, 2010, from <http://www.siauliuvandenys.lt/Ekskursijos/Nuoteku-valykla>. (In Lithuanian).

Šiaulių Vandenys. 2010b. Sewage treatment plants. Retrieved 21 June, 2010, from <http://www.siauliuvandenys.lt/Veikla/Nuoteku-tvarkymas/Nuoteku-valymo-irenginiai>. (In Lithuanian).

Statistics Finland. 2011. StatFin database. Retrieved 19 August, 2011, from [http://pxweb2.stat.fi/Dialog/varval.asp?ma=020\\_maku\\_tau\\_102\\_fi&ti=Maarakennuskustannusindeksi%2C+perusvuodet+2000%3D100%2C+1995%3D100+ja+1990%3D100&path=../Database/StatFin/hin/maku/&lang=3&multilang=fi](http://pxweb2.stat.fi/Dialog/varval.asp?ma=020_maku_tau_102_fi&ti=Maarakennuskustannusindeksi%2C+perusvuodet+2000%3D100%2C+1995%3D100+ja+1990%3D100&path=../Database/StatFin/hin/maku/&lang=3&multilang=fi). (In Finnish).

Swedish Environmental Protection Agency. 2010. Implementation of the Baltic Sea Action Plan (BSAP) in the Russian Federation; eutrophication segment, point sources - Results from the RusNIP project. RusNIP data. Information on WWTPs collected by RUSNIP\_030709, Swedish Environmental Protection Agency, Report 6368 Stockholm, Sweden, 125 pp.

Valtion ympäristöhallinnon virastot. 2010. Oiva - Environmental and GIS Database for Specialists, Finland's Environmental Administration, Helsinki, Finland. (In Finnish).

Vodokanal. 2006. Cost Effective Pollution Reduction Investments in St Petersburg. November 21, 2006. Vodokanal of St. Petersburg, Jaakko Pöyry Infra - Soil and Water and Sweco in association with Ramboll, Pecher, Lengiproinzprojekt, Sida and Ministry of the Environment of Finland, Water Utility, St. Petersburg, Russia.
